# Supplementary material for: The impact of Lewis acid variation on reactions with di-tert-butyl diazo diesters
Source: Royal Society of Chemistry journal article supplement (doi:10.1039/d3dt03506a), 2023-12-07
Supplement: d3dt03506a1.pdf [file d3dt03506a1.pdf]

## Supplementary Data for:

### The impact of Lewis acids variation on reactions with di-tert-butyl diazo diester

Vaibhav Bedi<sup>a</sup>, Dipendu Mandal<sup>a,b</sup>, Zahid Hussain<sup>b</sup>, Shi-Ming Chen<sup>a</sup>, Yile Wu<sup>b\*</sup>, Zheng-Wang Qu<sup>c\*</sup>, Stefan Grimme<sup>c</sup>, and Douglas W. Stephan<sup>ab</sup>

#### Contents

|                                                                                                                                                                                                               |    |
|---------------------------------------------------------------------------------------------------------------------------------------------------------------------------------------------------------------|----|
| General information .....                                                                                                                                                                                     | 2  |
| Synthesis of (tBuOCO(BBN)CN) <sub>2</sub> <b>1</b> .....                                                                                                                                                      | 2  |
| Figure S1. <sup>1</sup> H NMR (400 MHz) spectrum of the compound <b>1</b> in CDCl <sub>3</sub> (*= CDCl <sub>3</sub> ).....                                                                                   | 3  |
| Figure S2. <sup>11</sup> B NMR (128 MHz) spectrum of the compound <b>1</b> in CDCl <sub>3</sub> .....                                                                                                         | 3  |
| Figure S3. <sup>13</sup> C NMR (126 MHz) spectrum of the compound <b>3</b> in CDCl <sub>3</sub> (*= CDCl <sub>3</sub> ).....                                                                                  | 4  |
| Figure S4. HRMS (DART) spectrum of the compound .....                                                                                                                                                         | 4  |
| Synthesis of [tBuNHNH <sub>2</sub> tBu][BF <sub>4</sub> ] <b>2</b> .....                                                                                                                                      | 5  |
| Figure S5. HRMS (ESI) spectrum of the compound <b>2</b> .....                                                                                                                                                 | 5  |
| Synthesis of [tBuN(H)NtBu][B(C <sub>6</sub> F <sub>5</sub> ) <sub>4</sub> ] <b>3</b> .....                                                                                                                    | 5  |
| Figure S6. <sup>1</sup> H NMR (400 MHz) spectrum of the compound <b>3</b> in CDCl <sub>3</sub> /CH <sub>2</sub> Cl <sub>2</sub> (1:5) (*= CDCl <sub>3</sub> , #=<br>CH <sub>2</sub> Cl <sub>2</sub> ). .....  | 6  |
| Figure S7. <sup>19</sup> F NMR (377 MHz) spectrum of the compound <b>3</b> in CDCl <sub>3</sub> /CH <sub>2</sub> Cl <sub>2</sub> (1:5).....                                                                   | 6  |
| Figure S8. <sup>11</sup> B NMR (128 MHz) spectrum of the compound <b>3</b> in CDCl <sub>3</sub> /CH <sub>2</sub> Cl <sub>2</sub> (1:5).....                                                                   | 7  |
| Figure S9. <sup>13</sup> C NMR (101 MHz) spectrum of the compound <b>3</b> in CDCl <sub>3</sub> /CH <sub>2</sub> Cl <sub>2</sub> (1:5) (*= CDCl <sub>3</sub> , #=<br>CH <sub>2</sub> Cl <sub>2</sub> ). ..... | 7  |
| Figure S10. HRMS (ESI) spectrum of the compound <b>3</b> .....                                                                                                                                                | 8  |
| Figure S11. Raman Spectra (785 nm) of Compound <b>3</b> .....                                                                                                                                                 | 8  |
| Computational Details.....                                                                                                                                                                                    | 9  |
| References.....                                                                                                                                                                                               | 19 |

## General information

Experiments were carried under inert conditions using standard Schlenk techniques or a glove box as appropriate. Dichloromethane (DCM, CH<sub>2</sub>Cl<sub>2</sub>), toluene (PhCH<sub>3</sub>) and *n*-hexanes (C<sub>6</sub>H<sub>14</sub>) were dispensed from an MBRAUN Solvent Purification System, deoxygenated by bubbling nitrogen for 20 min, and stored over 3 Å molecular sieves prior to use. Chloroform-d (CDCl<sub>3</sub>) and Acetonitrile-d<sub>3</sub> (CD<sub>3</sub>CN) solvents were used as received without any purification and those were stored over 4 Å molecular sieves prior to use. Vials and stir bar for reactions were oven-dried overnight before experiments. <sup>1</sup>H (400 MHz), <sup>19</sup>F (377 MHz), <sup>31</sup>P (162 MHz), <sup>11</sup>B (128 MHz) and <sup>13</sup>C{<sup>1</sup>H} (101 MHz) NMR spectra were run at 298 K on Bruker 400 spectrometer. The chemical shifts (δ, ppm) for <sup>1</sup>H and <sup>13</sup>C{<sup>1</sup>H} NMR spectra are given relative to solvent signals whereas an external reference standards used for <sup>19</sup>F (CFCl<sub>3</sub>), <sup>31</sup>P (85% H<sub>3</sub>PO<sub>4</sub>) and <sup>11</sup>B (BF<sub>3</sub>·OEt<sub>2</sub>) NMR spectra. These NMR data are given as: chemical shift, multiplicity (s = singlet, d = doublet, t = triplet, q = quartet, m = multiplet, br = broad), coupling constants (Hz) and integration. The single-crystal X-ray data were collected on a Bruker Kappa Apex II diffractometer which was equipped with rotation anode using graphite-monochromated MoKα radiation (λ = 0.71073 Å) at 150 K. Structures were solved and refined using Full-matrix least-squares based on *F*<sup>2</sup> with a suite of programs SHELXS and SHELXL<sup>1</sup> compiled in OLEX2<sup>2</sup> High-resolution mass spectra (HRMS) were obtained on an AccuTOF Plus 4G (DART), Agilent 6538 UHD (ESI) or MALDI-TOF at AIMS Mass Spectrometry Laboratory whilst elemental (CHN) analysis was performed on Thermo Scientific Flash 2000 CHNS Analyzer at ANALEST Facility, University of Toronto. The reagent [Et<sub>3</sub>Si][B(C<sub>6</sub>F<sub>5</sub>)<sub>4</sub>]<sup>3</sup> was prepared by following literature method or a slight variations thereof. All other reagents were purchased commercially and used as received.

## Synthesis of (tBuOCO(BBN)CN)<sub>2</sub> 1

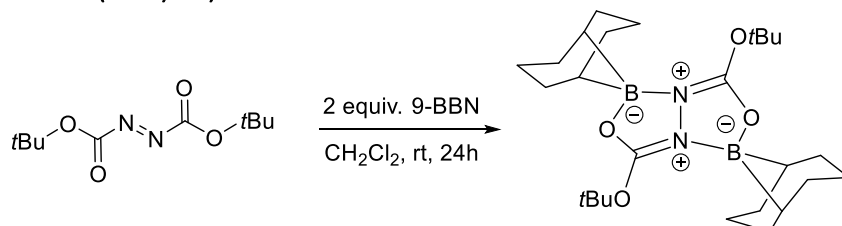

An open top PTFE (4 mL) vial was charged with di-(*t*-butyl) azodicarboxylate (DBAD, 50 mg, 0.22 mmol, 1.0 equiv.) in CH<sub>2</sub>Cl<sub>2</sub>, and then 9-BBN (100 mg, 0.43 mmol, 2.0 equiv.) dissolved in CH<sub>2</sub>Cl<sub>2</sub> (2.0 ml) was added slowly with stirring. The color of the solution slowly changed from yellow to white in 3 hours and there was white precipitation in the solution. After 24h, the solution was filtered and washed with cold CH<sub>2</sub>Cl<sub>2</sub> and pentane. Colourless crystals suitable for single crystal X-ray diffraction were obtained by dissolving the reaction mixture in CH<sub>2</sub>Cl<sub>2</sub> and layering it with *n*-hexane (1:5) at -30 °C for couple of days. After removal of oily liquid, crystals were washed with a minimum CH<sub>2</sub>Cl<sub>2</sub> (1 x 0.3 mL) followed by drying afforded compound 1 (62 mg, 60%). δ<sub>H</sub> 1H NMR S9 (400 MHz, CDCl<sub>3</sub>): 1.94 - 0.73 (m, 28 H, 9-BBN CH & CH<sub>2</sub>), 1.57 (s, 18 H, -OC(CH<sub>3</sub>)<sub>3</sub>); <sup>11</sup>B NMR (128 MHz, CDCl<sub>3</sub>): δ<sub>B</sub> 12.7 (br s, 2 B, 9-BBN); <sup>13</sup>C NMR (101 MHz, CDCl<sub>3</sub>): δ<sub>C</sub> 160 (s, N=C(O*t*Bu)O-), 88.8 (s, -OC(CH<sub>3</sub>)<sub>3</sub>), 34.2 (s, CH<sub>2</sub>, 9-BBN), 30.3 (s, CH<sub>2</sub>, 9-BBN), 27.9 (s, CH, 9-BBN), 24.8 (s, CH<sub>2</sub>, 9-BBN), 24.5 (s, OC(CH<sub>3</sub>)<sub>3</sub>); HRMS (DART) *m/z*: 473.3727 for [M<sup>+</sup>+1] (calcd.: 473.3716).



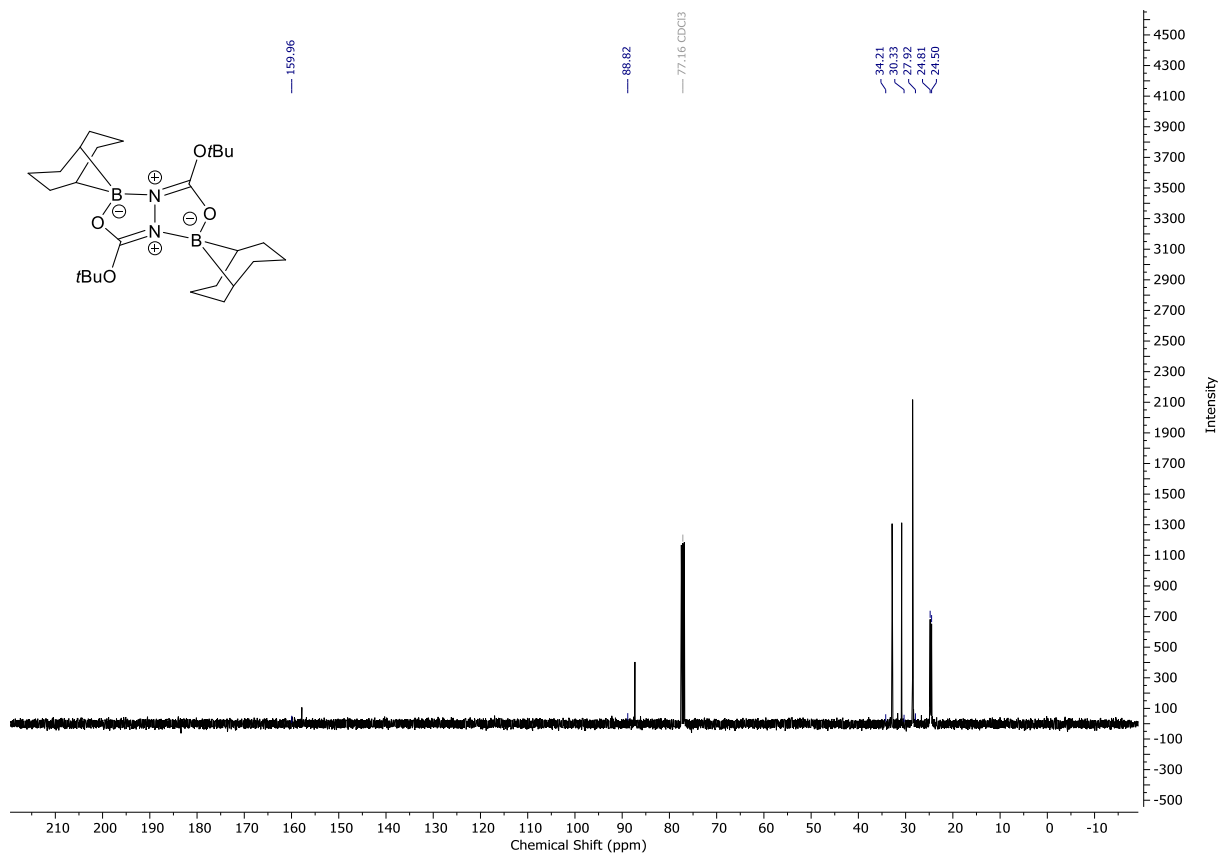

Figure S3.  $^{13}\text{C}$  NMR (126 MHz) spectrum of the compound **3** in  $\text{CDCl}_3$  (\* =  $\text{CDCl}_3$ )

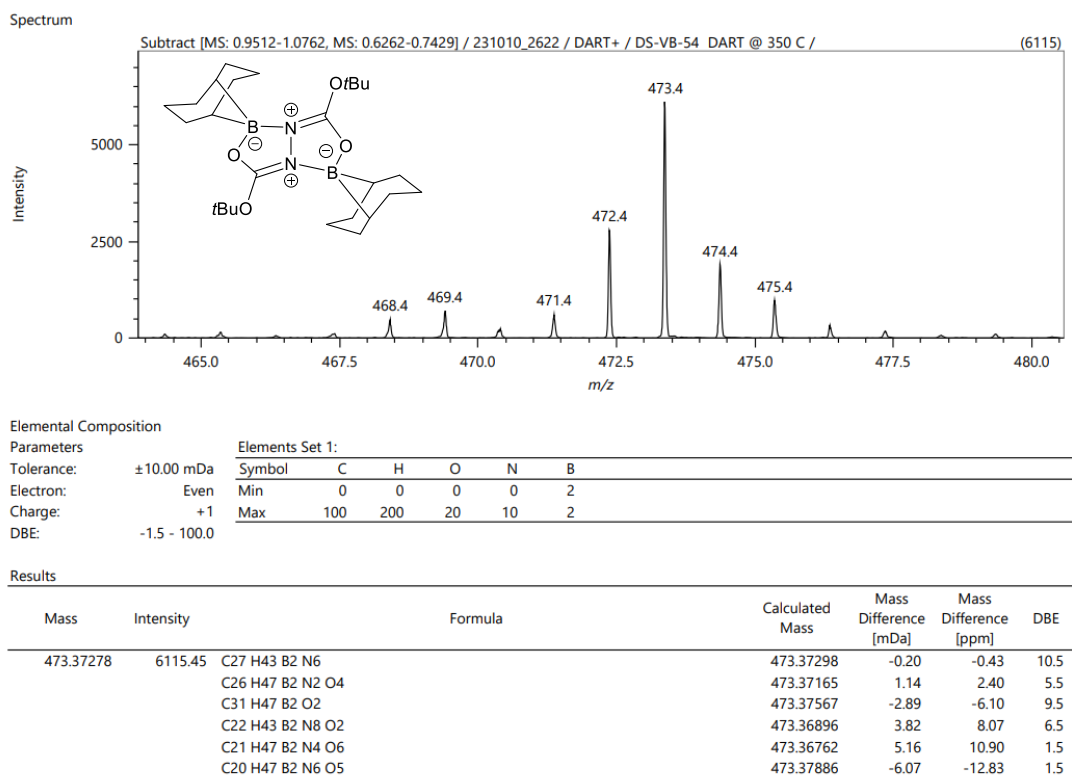

Figure S4. HRMS (DART) spectrum of the compound

## Synthesis of [tBuNHNH<sub>2</sub>tBu][BF<sub>4</sub>] 2

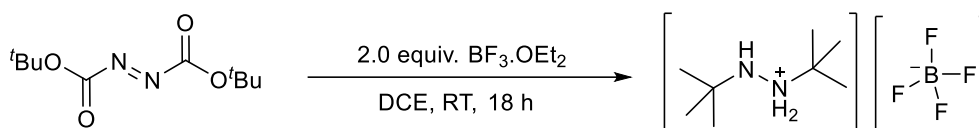

An open top PTFE (4 mL) vial was charged with BF<sub>3</sub>·OEt<sub>2</sub> (142 mg (123 uL), 1.0 mmol, 2.0 equiv.) in CH<sub>2</sub>Cl<sub>2</sub> (1.0 mL). Then a solution of di-(*t*-butyl) azodicarboxylate (DBAD) (115 mg, 0.50 mmol, 1.0 equiv.) in CH<sub>2</sub>Cl<sub>2</sub> (1.0 mL) was added drop wise gently, immediate effervescence with color change from yellow to colorless was noted. The reaction mixture was allowed to stand at room temperature for additional 18 hours without stirring. Colourless crystals suitable for single crystal X-ray diffraction were directly obtained from the reaction mixture. The crystals were filtered, washed with cold CH<sub>2</sub>Cl<sub>2</sub> (kept at -30°C) and hexane, followed by drying under reduced pressure afforded compound **2** in 35% (41.0 mg) yield. HRMS (DART) *m/z*: 145.1711 for [M<sup>+</sup>+1] (calcd.: 145.1699). **Note:** Compound **2** was insoluble in all coordinating organic solvents with which it does not react.

### Target Ion Species

| Ion Species    | <i>m/z</i> | Ionic Formula                                 |
|----------------|------------|-----------------------------------------------|
| M <sup>+</sup> | 145.1711   | C <sub>8</sub> H <sub>21</sub> N <sub>2</sub> |

### MFG Calculator Results

| Target <i>m/z</i> | Ionic Formula                                 | Calc <i>m/z</i> | +/- (mDa) | +/- (ppm) | DBE  | MFG Score |
|-------------------|-----------------------------------------------|-----------------|-----------|-----------|------|-----------|
| 145.1711          | C <sub>8</sub> H <sub>21</sub> N <sub>2</sub> | 145.1699        | 1.2       | 8.3       | -0.5 | 80.38     |

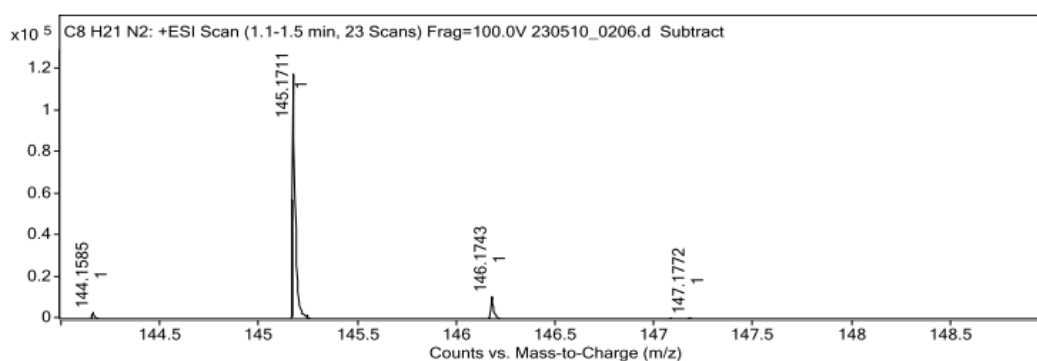

### Predicted Isotope Match Table

| Isotope | <i>m/z</i> | Calc <i>m/z</i> | Diff (mDa) | Abund (%) | Calc Abund (%) | +/- |
|---------|------------|-----------------|------------|-----------|----------------|-----|
| 1       | 145.1711   | 145.1699        | 1.2        | 100.0     | 100.0          | 0.0 |
| 2       | 146.1743   | 146.1729        | 1.4        | 9.3       | 9.6            | 0.3 |

Figure S5. HRMS (ESI) spectrum of the compound **2**

## Synthesis of [tBuN(H)NtBu][B(C<sub>6</sub>F<sub>5</sub>)<sub>4</sub>] 3

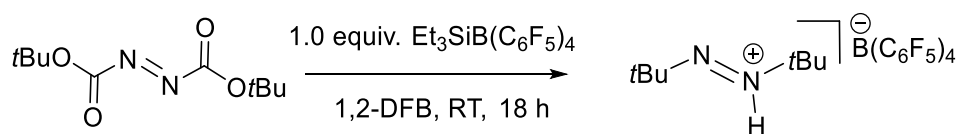

Into a 4 mL vial equipped with a stir bar, [Et<sub>3</sub>Si][B(C<sub>6</sub>F<sub>5</sub>)<sub>4</sub>] (79.0 mg, 0.10 mmol, 1.0 equiv.) was taken in 1,2-DFB (0.5 mL). A solution of di-*tert*-butyl azodicarboxylate (23.0 mg, 0.10 mmol, 1.0 equiv.) in 1,2-DFB (0.5 mL) was transferred to the vial. At addition a gentle bubble observed. The reaction

mixture was allowed to stir at RT for 18 h. After removal of all volatiles, the residue was washed with *n*-hexane (3 x 1 mL) and crystallized with a mixture of solvent of CH<sub>2</sub>Cl<sub>2</sub>:*n*-hexane (1:5) at -30 °C for a week. After removal of oily liquid, crystals were washed with a minimum CHCl<sub>3</sub> (1 x 0.3 mL) followed by drying afforded compound **1** (34 mg, 41%). **1**: <sup>1</sup>H NMR (400 MHz, CDCl<sub>3</sub>/CH<sub>2</sub>Cl<sub>2</sub>): δ<sub>H</sub> 12.42 (br s, 1 H, -NH<sup>+</sup>), 1.64 (s, 9 H, CH<sub>3</sub> of *t*Bu), 1.54 (s, 9 H, CH<sub>3</sub> of *t*Bu); <sup>19</sup>F NMR (377 MHz, CDCl<sub>3</sub>/CH<sub>2</sub>Cl<sub>2</sub>): δ<sub>F</sub> -132.8 (m, 8 F, *o*-C<sub>6</sub>F<sub>5</sub> of -B(C<sub>6</sub>F<sub>5</sub>)<sub>4</sub>), -162.8 (m, 4 F, *p*-C<sub>6</sub>F<sub>5</sub> of -B(C<sub>6</sub>F<sub>5</sub>)<sub>4</sub>), -166.8 (m, 8 F, *m*-C<sub>6</sub>F<sub>5</sub> of -B(C<sub>6</sub>F<sub>5</sub>)<sub>4</sub>); <sup>11</sup>B NMR (128 MHz, CDCl<sub>3</sub>/CH<sub>2</sub>Cl<sub>2</sub>): δ<sub>B</sub> 16.7 (br s, 1 B, -B(C<sub>6</sub>F<sub>5</sub>)<sub>4</sub>); <sup>13</sup>C NMR (126 MHz, CD<sub>2</sub>Cl<sub>2</sub>): δ<sub>C</sub> 149.4 (br m, -C<sub>6</sub>F<sub>5</sub>), 146.8 (br m, -C<sub>6</sub>F<sub>5</sub>), 139.9 (br m, -C<sub>6</sub>F<sub>5</sub>), 137.6 (br m, -C<sub>6</sub>F<sub>5</sub>), 134.9 (br m, -C<sub>6</sub>F<sub>5</sub>), 63.9 (s, -CMe<sub>3</sub>), 61.5 (s, -CMe<sub>3</sub>), 26.0 (s, -CH<sub>3</sub> of *t*Bu), 25.0 (s, -CH<sub>3</sub> of *t*Bu).

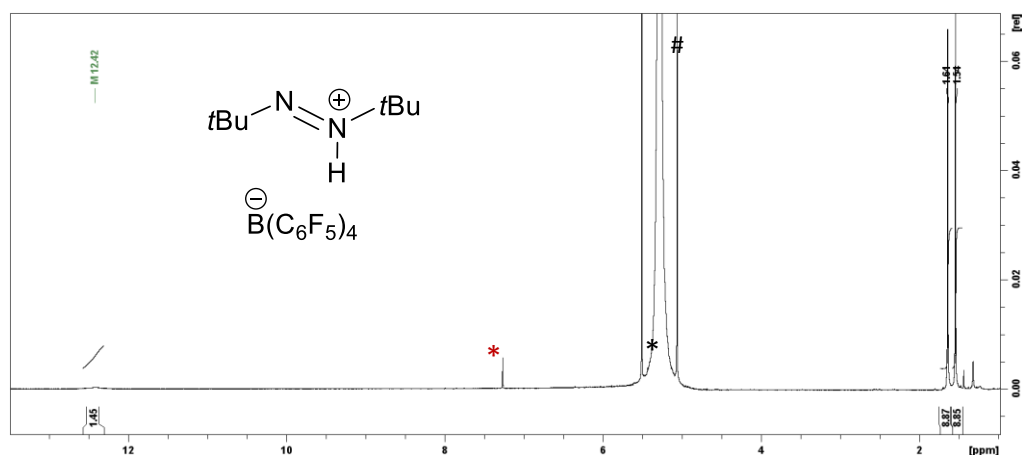

Figure S6. <sup>1</sup>H NMR (400 MHz) spectrum of the compound **3** in CDCl<sub>3</sub>/CH<sub>2</sub>Cl<sub>2</sub> (1:5) (\* = CDCl<sub>3</sub>, # = CH<sub>2</sub>Cl<sub>2</sub>).

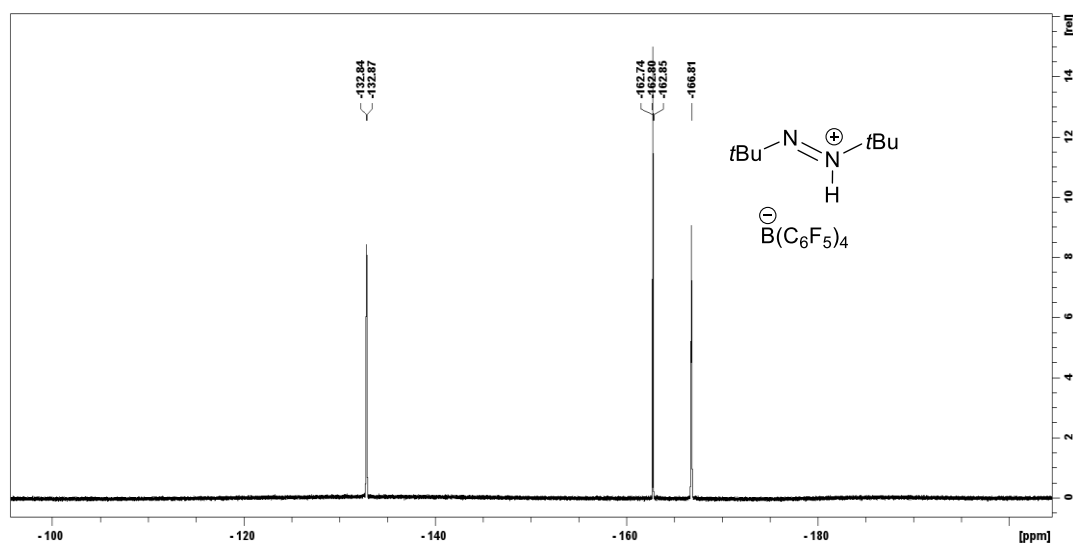

Figure S7. <sup>19</sup>F NMR (377 MHz) spectrum of the compound **3** in CDCl<sub>3</sub>/CH<sub>2</sub>Cl<sub>2</sub> (1:5).

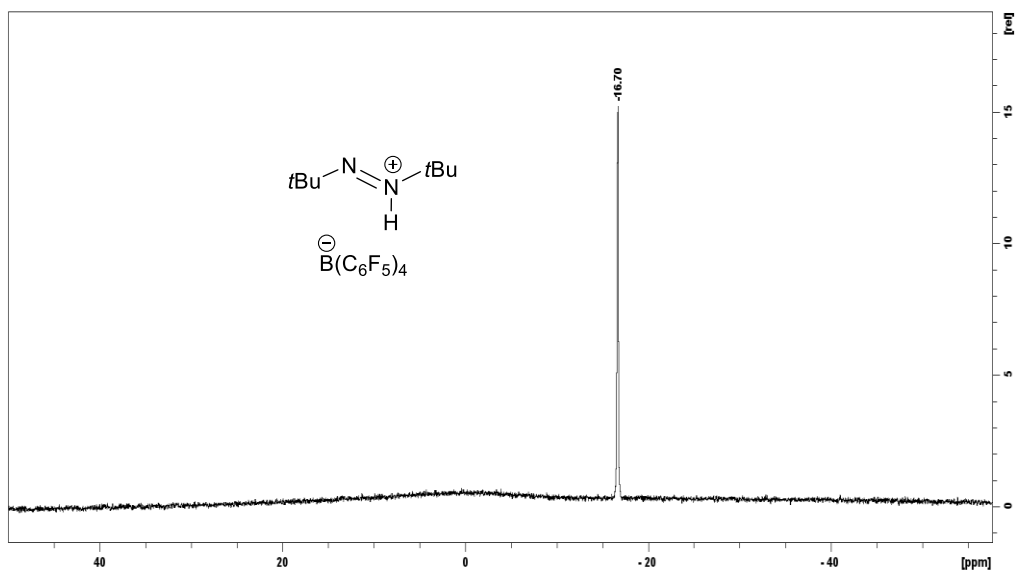

Figure S8. <sup>11</sup>B NMR (128 MHz) spectrum of the compound **3** in CDCl<sub>3</sub>/CH<sub>2</sub>Cl<sub>2</sub> (1:5).

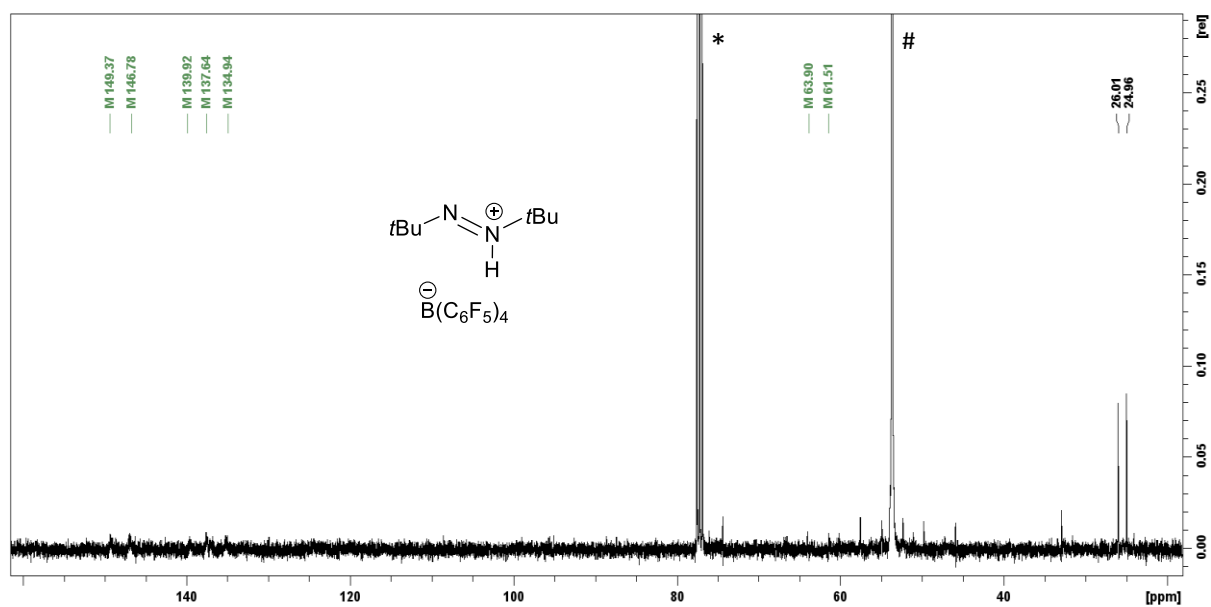

Figure S9. <sup>13</sup>C NMR (101 MHz) spectrum of the compound **3** in CDCl<sub>3</sub>/CH<sub>2</sub>Cl<sub>2</sub> (1:5) (\* = CDCl<sub>3</sub>, # = CH<sub>2</sub>Cl<sub>2</sub>).

### Target Ion Species

| Ion Species | m/z      | Ionic Formula |
|-------------|----------|---------------|
| M+          | 145.1699 | C8 H21 N2     |

### MFG Calculator Results

| Target m/z | Ionic Formula | Calc m/z | +/- (mDa) | +/- (ppm) | DBE  | MFG Score |
|------------|---------------|----------|-----------|-----------|------|-----------|
| 145.1699   | C8 H21 N2     | 145.1699 | 0.0       | 0.0       | -0.5 | 87.93     |

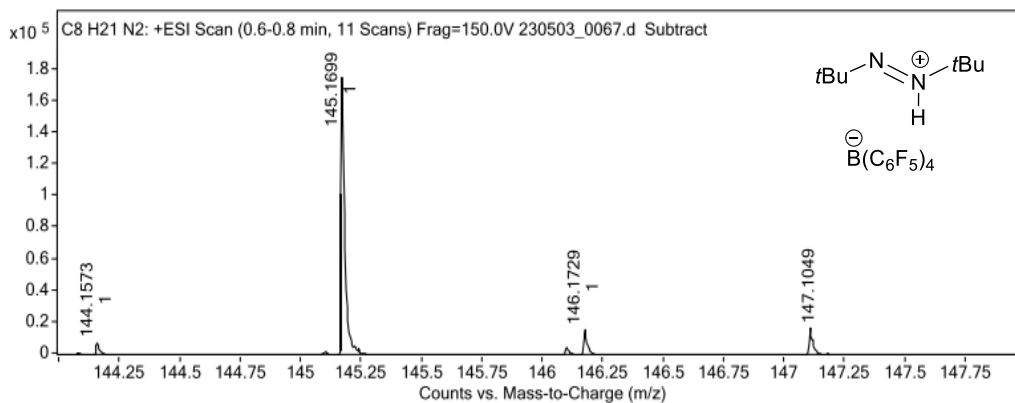

### Predicted Isotope Match Table

| Isotope | m/z      | Calc m/z | Diff (mDa) | Abund (%) | Calc Abund (%) | +/- |
|---------|----------|----------|------------|-----------|----------------|-----|
| 1       | 145.1699 | 145.1699 | 0.0        | 100.0     | 100.0          | 0.0 |
| 2       | 146.1729 | 146.1729 | 0.0        | 9.2       | 9.6            | 0.4 |

Figure S10. HRMS (ESI) spectrum of the compound **3**.

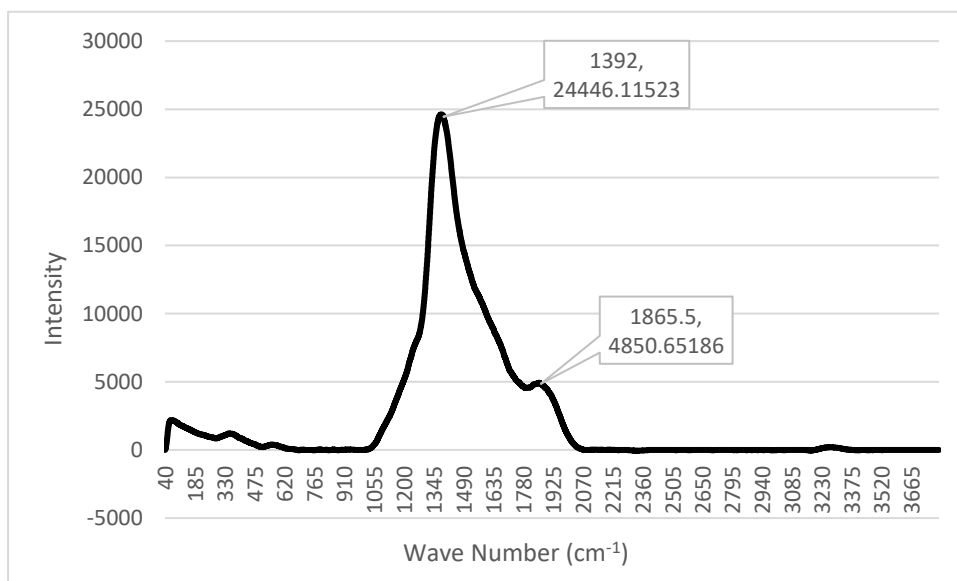

Figure S11. Raman Spectra (785 nm) of Compound **3**



## Computational Details

The quantum chemical DFT calculations have been performed with the TURBOMOLE 7.4 suite of programs<sup>[114]</sup> The initial structures generated according to their Lewis structures are checked with the CREST method using the xTB program for low-lying conformers as input.<sup>[1215]</sup> The structures are fully optimized at the TPSS-D3/def2-TZVP + COSMO level of theory, which combines the TPSS meta-GGA density functional<sup>[316]</sup> with the BJ-damped DFT-D3 dispersion correction<sup>[417]</sup> and the def2-TZVP basis set,<sup>[518]</sup> using the Conductor-like Screening Model (COSMO) continuum solvation model<sup>[619]</sup> for CH<sub>2</sub>Cl<sub>2</sub> solvent (dielectric constant  $\epsilon = 8.93$  and solvent radius  $R_{\text{solv}} = 2.94 \text{ \AA}$ ). The density-fitting RI-J approach<sup>[5a, 718, 10]</sup> is used to accelerate the geometry optimization and numerical harmonic frequency calculations<sup>[8111]</sup> in solution. The optimized structures are characterized by frequency analysis to identify the nature of located stationary points (no imaginary frequency for true minima and only one imaginary frequency for transition state) and to provide thermal corrections (at 298.15 K and 1 atm) according to the modified ideal gas–rigid rotor–harmonic oscillator model.<sup>[9112]</sup> This choice of dispersion-corrected meta-GGA functional makes the efficient exploration of all potential reaction paths possible.

The final solvation free energies in CH<sub>2</sub>Cl<sub>2</sub> solution are computed with the COSMO-RS solvation model<sup>[10113]</sup> (parameter file: BP\_TZVP\_C30\_1601.ctd) using the COSMOtherm program package<sup>[11114]</sup> on the above TPSS-D3 optimized structures, and corrected by  $+1.89 \text{ kcal}\cdot\text{mol}^{-1}$  to account for higher reference solute concentration of  $1 \text{ mol}\cdot\text{L}^{-1}$  usually used in solution. To check the effects of the chosen DFT functional on the reaction energies and barriers, single-point calculations at the meta-GGA TPSS-D3<sup>[316]</sup> and hybrid-meta-GGA PW6B95-D3<sup>[12115]</sup> levels are performed using a larger def2-QZVP basis set.<sup>[5b, 1318, 16]</sup> The final reaction Gibbs free energies ( $\Delta G$ ) are determined from the electronic single-point energies plus TPSS-D3 thermal corrections and COSMO-RS solvation free energies. In our discussion, higher-level PW6B95-D3 Gibbs free energies (in kcal/mol, at 298.15 K and 1 mol/L concentration) will be used in our discussion unless specified otherwise. The applied DFT methods in combination with the large AO basis set provide usually accurate electronic energies leading to errors for chemical energies (including barriers) on the order of typically 1-2 kcal/mol. This has been tested thoroughly for the huge data base GMTKN55<sup>[14117]</sup> which is the common standard in the field of DFT benchmarking.

**Table S1.** TPSS-D3/def2-TZVP + COSMO computed imaginary frequency (ImF), zero-point energies (ZPE), gas-phase enthalpic (Hc) and Gibbs free-energy (Gc) corrections; the COSMO-RS computed solvation enthalpic (Hsol) and Gibbs free-energy (Gsol) corrections in CH<sub>2</sub>Cl<sub>2</sub> solution; TPSS-D3/def2-QZVP and PW6B95-D3/def2-QZVP single-point energies (TPSS-D3 and PW6B95-D3); the total PW6B95-D3 free energies G<sub>P</sub>; the relative electronic energies ( $\Delta E_T$  and  $\Delta E_P$ ) and Gibbs energies ( $\Delta G_T$  and  $\Delta G_P$ ) at the TPSS-D3 and PW6B95-D3 levels. (*t*Bu = CMe<sub>3</sub>)

| Reactions                                                                                                                                                                                                | ImF              | ZPE      | Hc       | Gc       | Hsol     | Gsol     | TPSS-D3        | PW6B95-D3      | G <sub>P</sub> | $\Delta E_T$ | $\Delta E_P$ | $\Delta G_P$ | $\Delta G_T$ | Shift    |
|----------------------------------------------------------------------------------------------------------------------------------------------------------------------------------------------------------|------------------|----------|----------|----------|----------|----------|----------------|----------------|----------------|--------------|--------------|--------------|--------------|----------|
| in CH <sub>2</sub> Cl <sub>2</sub>                                                                                                                                                                       | cm <sup>-1</sup> | kcal/mol | kcal/mol | kcal/mol | kcal/mol | kcal/mol | E <sub>h</sub> | E <sub>h</sub> | E <sub>h</sub> | kcal/mol     | kcal/mol     | kcal/mol     | kcal/mol     | kcal/mol |
| Upon OEt <sub>2</sub> elimination, BF <sub>3</sub> may easily bind to an ester carbonyl oxygen                                                                                                           |                  |          |          |          |          |          |                |                |                |              |              |              |              |          |
| BF <sub>3</sub> ·OEt <sub>2</sub> + <b>R</b>                                                                                                                                                             | 0                | 266.99   | 286.88   | 217.05   | -32.81   | -22.80   | -1361.39237    | -1362.77378    | -1362.45819    | 0.00         | 0.00         | 0.00         | 0.00         |          |
| <b>TSA</b>                                                                                                                                                                                               | 66i              | 265.47   | 286.77   | 227.55   | -24.46   | -17.17   | -1361.38745    | -1362.77009    | -1362.43182    | 3.09         | 2.31         | 16.55        | 17.33        |          |
| <b>A</b> + OEt <sub>2</sub>                                                                                                                                                                              | 0                | 265.96   | 286.16   | 216.89   | -31.73   | -21.41   | -1361.38376    | -1362.76475    | -1362.44720    | 5.40         | 5.67         | 6.90         | 6.64         |          |
| ..which induce <i>t</i> Bu <sup>+</sup> elimination from ester group, and then bind to the proximal nitrogen atom; proton transfer from <i>t</i> Bu <sup>+</sup> to N atom is kinetically less favorable |                  |          |          |          |          |          |                |                |                |              |              |              |              |          |
| <b>A</b>                                                                                                                                                                                                 | 0                | 181.79   | 197.10   | 151.04   | -23.69   | -17.01   | -1127.56659    | -1128.71189    | -1128.49529    | 0.00         | 0.00         | 0.00         | 0.00         | 6.90     |
| <b>Ao<sup>-</sup> + tBu<sup>+</sup></b>                                                                                                                                                                  | 0                | 178.00   | 193.52   | 133.90   | -120.71  | -106.46  | -1127.38258    | -1128.52862    | -1128.47887    | 115.47       | 115.01       | 10.30        | 10.76        | 17.20    |
| <b>TSB1</b>                                                                                                                                                                                              | 1208i            | 176.18   | 192.13   | 143.67   | -31.56   | -23.62   | -1127.52662    | -1128.66300    | -1128.46868    | 25.08        | 30.68        | 16.70        | 11.10        | 23.60    |
| <b>B1</b> + CH <sub>2</sub> =CMe <sub>2</sub>                                                                                                                                                            | 0                | 179.79   | 195.13   | 135.92   | -36.34   | -27.18   | -1127.52257    | -1128.66586    | -1128.48656    | 27.62        | 28.89        | 5.48         | 4.21         | 12.38    |
| <b>TSB</b>                                                                                                                                                                                               | 65i              | 177.87   | 193.41   | 146.30   | -37.93   | -28.33   | -1127.52150    | -1128.66555    | -1128.47454    | 28.29        | 29.08        | 13.02        | 12.23        | 19.92    |
| <b>B</b>                                                                                                                                                                                                 | 0                | 182.10   | 197.25   | 151.86   | -24.57   | -18.17   | -1127.57127    | -1128.71324    | -1128.49717    | -2.94        | -0.84        | -1.18        | -3.28        | 5.72     |
| ..followed by very fast CO <sub>2</sub> elimination and BF <sub>3</sub> binding to the ester carbonyl oxygen                                                                                             |                  |          |          |          |          |          |                |                |                |              |              |              |              |          |
| <b>TSC</b>                                                                                                                                                                                               | 189i             | 180.13   | 195.92   | 148.69   | -17.55   | -12.67   | -1127.57199    | -1128.71154    | -1128.49176    | -3.39        | 0.22         | 2.21         | -1.40        | 9.11     |
| <b>Co</b> + CO <sub>2</sub> + BF <sub>3</sub>                                                                                                                                                            | 0                | 179.43   | 194.94   | 126.04   | -21.23   | -12.21   | -1127.57331    | -1128.71748    | -1128.52705    | -4.22        | -3.50        | -19.93       | -20.65       | -13.03   |
| <b>C</b> + CO <sub>2</sub>                                                                                                                                                                               | 0                | 180.63   | 196.04   | 139.55   | -24.33   | -16.29   | -1127.59062    | -1128.73500    | -1128.53254    | -15.08       | -14.50       | -23.38       | -23.96       | -16.48   |
| Further <i>t</i> Bu <sup>+</sup> elimination and binding to N-atom is kinetically even more facile, followed by easy CO <sub>2</sub> elimination to produce <b>E</b> ( <i>t</i> BuN) <sub>2</sub>        |                  |          |          |          |          |          |                |                |                |              |              |              |              |          |
| <b>C</b>                                                                                                                                                                                                 | 0                | 173.54   | 186.70   | 145.46   | -21.16   | -15.42   | -938.88519     | -939.84111     | -939.63086     | 0.00         | 0.00         | 0.00         | 0.00         | -16.48   |
| <b>Co<sup>-</sup> + tBu<sup>+</sup></b>                                                                                                                                                                  | 0                | 169.32   | 183.06   | 127.22   | -123.64  | -108.11  | -938.69121     | -939.64804     | -939.61157     | 121.73       | 121.16       | 12.11        | 12.68        | -4.37    |
| <b>TSD</b>                                                                                                                                                                                               | 89i              | 169.54   | 183.72   | 139.74   | -33.55   | -24.14   | -938.84293     | -939.79121     | -939.60398     | 26.52        | 31.32        | 16.87        | 12.07        | 0.39     |
| <b>D</b>                                                                                                                                                                                                 | 0                | 173.85   | 187.07   | 145.66   | -25.38   | -18.81   | -938.89849     | -939.85344     | -939.64828     | -8.35        | -7.74        | -10.93       | -11.54       | -27.41   |
| <b>TSE</b>                                                                                                                                                                                               | 133i             | 171.67   | 185.59   | 142.27   | -13.02   | -9.27    | -938.90278     | -939.85517     | -939.64020     | -11.04       | -8.82        | -5.86        | -8.07        | -22.34   |
| <b>E</b> + CO <sub>2</sub> + BF <sub>3</sub>                                                                                                                                                             | 0                | 170.54   | 184.40   | 119.05   | -15.13   | -7.97    | -938.90756     | -939.86571     | -939.67965     | -14.03       | -15.44       | -30.61       | -29.21       | -47.09   |

**Table S2.** TPSS-D3/def2-TZVP + COSMO optimized Cartesian coordinates (in Å) in CH<sub>2</sub>Cl<sub>2</sub> solution. Each structure is labeled by a specific name (See **Table S1**), followed by the number of atoms, the total energy (in hartrees), and the detailed atomic coordinates (in double-column text list).

**Ao<sup>-</sup>** : anion from tBu<sup>+</sup> elimination of **A**  
25

Energy = -969.7422769647

|   |            |            |            |
|---|------------|------------|------------|
| N | 1.0702517  | -1.4191399 | -1.2172665 |
| N | -0.0858994 | -1.8014416 | -1.4853341 |
| C | 2.0492581  | -1.7495715 | -2.2501557 |
| O | 2.5534360  | -2.9310632 | -2.0585284 |
| O | 2.3218877  | -0.8842271 | -3.0620495 |
| C | -1.0624958 | -1.4623778 | -0.4679576 |
| O | -1.5033609 | -2.3314806 | 0.2564258  |
| O | -1.4038914 | -0.1899422 | -0.5721010 |
| C | -2.5221614 | 0.3864759  | 0.2683883  |
| C | -2.1340372 | 0.2898090  | 1.7408291  |
| C | -2.5601420 | 1.8342410  | -0.2070921 |
| C | -3.8189010 | -0.3465714 | -0.0614554 |
| H | -2.8792824 | 0.8295046  | 2.3343306  |
| H | -2.1029464 | -0.7478837 | 2.0772048  |
| H | -1.1580433 | 0.7551644  | 1.9089470  |
| H | -1.6016811 | 2.3261833  | -0.0182522 |
| H | -2.7797187 | 1.8823647  | -1.2775491 |
| H | -3.3432071 | 2.3714972  | 0.3365667  |
| H | -3.7867273 | -1.3852589 | 0.2718849  |
| H | -4.6446219 | 0.1595126  | 0.4492979  |
| H | -4.0109463 | -0.3163481 | -1.1383524 |
| B | 3.7159533  | -3.4788360 | -2.8992353 |
| F | 3.3171558  | -3.5795664 | -4.2355485 |
| F | 4.8269584  | -2.6415255 | -2.7575771 |
| F | 3.9736210  | -4.7446010 | -2.3587966 |

**A** : BF<sub>3</sub> adduct of (NCO<sub>2</sub>tBu)<sub>2</sub> at carbonyl  
38

Energy = -1127.518402328

|   |            |            |            |
|---|------------|------------|------------|
| N | -1.7622407 | -0.7621094 | 1.3612664  |
| N | -2.5700520 | -1.6877496 | 1.1641001  |
| C | -0.5586288 | -1.1443390 | 2.0295374  |
| O | -0.2713542 | -0.6529007 | 3.1442556  |
| O | 0.2067969  | -1.8985736 | 1.3270598  |
| C | -3.7290690 | -1.2731629 | 0.3763417  |
| O | -3.7539553 | -1.5750709 | -0.7968318 |
| O | -4.6111712 | -0.6976580 | 1.1532165  |
| C | 1.6567272  | -2.2779898 | 1.7631347  |
| C | 2.4622620  | -0.9927768 | 1.8704277  |
| C | 1.5628285  | -3.0678302 | 3.0593033  |
| C | 2.0900561  | -3.1395126 | 0.5884341  |
| H | 2.3936911  | -0.4144809 | 0.9449176  |
| H | 2.1443174  | -0.3787036 | 2.7142346  |
| H | 3.5102571  | -1.2693708 | 2.0230308  |

|   |            |            |            |
|---|------------|------------|------------|
| H | 0.8733433  | -3.9094503 | 2.9499951  |
| H | 2.5580374  | -3.4682374 | 3.2773671  |
| H | 1.2523358  | -2.4429674 | 3.8977234  |
| H | 3.1126527  | -3.4835921 | 0.7689175  |
| H | 1.4407338  | -4.0130462 | 0.4870253  |
| H | 2.0735054  | -2.5658644 | -0.3419133 |
| C | -5.9821205 | -0.2848423 | 0.6251886  |
| C | -5.7810939 | 0.7595473  | -0.4665707 |
| C | -6.7116770 | -1.5334213 | 0.1449583  |
| C | -6.6262241 | 0.3098848  | 1.8701279  |
| H | -5.1722834 | 1.5894219  | -0.0956571 |
| H | -5.3083851 | 0.3284762  | -1.3509797 |
| H | -6.7614689 | 1.1541448  | -0.7518389 |
| H | -6.7524525 | -2.2836421 | 0.9402552  |
| H | -7.7374557 | -1.2543720 | -0.1162847 |
| H | -6.2339252 | -1.9632562 | -0.7374264 |
| H | -7.6328901 | 0.6571315  | 1.6192155  |
| H | -6.7011163 | -0.4402251 | 2.6622780  |
| H | -6.0433509 | 1.1592420  | 2.2370029  |
| B | -1.2274227 | 0.3224422  | 4.0445974  |
| F | -2.4628887 | -0.2859305 | 4.1020487  |
| F | -0.5638098 | 0.3396704  | 5.2502161  |
| F | -1.2302442 | 1.5373365  | 3.3968421  |

**B1** : from tBu<sup>+</sup> proton transfer to **Ao<sup>-</sup>**

26

Energy = -970.1707547926

|   |            |            |            |
|---|------------|------------|------------|
| N | 2.6258259  | -0.5249726 | -1.0165774 |
| N | 3.2878355  | -0.1733123 | -0.0482489 |
| C | 1.0803855  | -0.7468699 | -0.9907066 |
| C | 4.7738344  | -0.2223998 | -0.3967877 |
| O | 0.5756397  | -0.0976560 | -0.0326190 |
| O | 0.7175327  | -1.4891488 | -1.8661342 |
| O | 5.3963958  | 0.2000871  | 0.6575086  |
| O | 5.1336335  | -0.6025681 | -1.4852290 |
| B | -0.9949019 | -0.1533647 | 0.2749330  |
| F | -1.2977830 | -1.4721099 | 0.5679866  |
| F | -1.1325584 | 0.6871835  | 1.3622967  |
| F | -1.6427433 | 0.3139779  | -0.8559998 |
| H | 3.1221599  | -0.8175147 | -1.8912705 |
| C | 6.9390211  | 0.2906800  | 0.6744587  |
| C | 7.3636072  | 1.2648924  | -0.4156728 |
| C | 7.1947613  | 0.8343297  | 2.0710147  |
| C | 7.4866441  | -1.1176296 | 0.4880279  |
| H | 7.1587193  | 0.8730803  | -1.4136533 |
| H | 6.8646888  | 2.2296117  | -0.2881614 |
| H | 8.4427430  | 1.4217674  | -0.3227128 |

|   |           |            |            |
|---|-----------|------------|------------|
| H | 6.8109913 | 0.1489432  | 2.8313244  |
| H | 8.2742002 | 0.9422525  | 2.2109516  |
| H | 6.7266757 | 1.8140800  | 2.1982808  |
| H | 7.0770911 | -1.7947976 | 1.2426996  |
| H | 7.2753621 | -1.5067730 | -0.5098479 |
| H | 8.5725006 | -1.0752838 | 0.6176600  |

BF<sub>3</sub>·OEt<sub>2</sub> : adduct of BF<sub>3</sub> and OEt<sub>2</sub>

19

Energy = -558.5640588309

|   |            |            |            |
|---|------------|------------|------------|
| B | 0.9862194  | -0.1981947 | -0.0522432 |
| F | 1.2508381  | -1.5169312 | -0.3798362 |
| F | 1.2569916  | 0.0730371  | 1.2808994  |
| F | 1.5612025  | 0.7139927  | -0.9163165 |
| H | 0.0232444  | 2.4488931  | 0.8358518  |
| C | -1.0257301 | 2.2584128  | 0.5989474  |
| C | -1.1589243 | 1.2983518  | -0.5651059 |
| H | -1.4964241 | 3.2048791  | 0.3120493  |
| H | -1.5331445 | 1.8863845  | 1.4937267  |
| O | -0.5843698 | -0.0385611 | -0.2703006 |
| H | -2.1988846 | 1.1031358  | -0.8315346 |
| H | -0.6171268 | 1.6345465  | -1.4473523 |
| C | -1.4657465 | -0.9370767 | 0.5176067  |
| C | -2.3786808 | -1.7062869 | -0.4116025 |
| H | -2.0079364 | -0.3093464 | 1.2275270  |
| H | -0.7854319 | -1.5895136 | 1.0633463  |
| H | -3.0104690 | -2.3682561 | 0.1899925  |
| H | -3.0332623 | -1.0385279 | -0.9795771 |
| H | -1.7960269 | -2.3151746 | -1.1076096 |

BF<sub>3</sub> : Lewis acid

4

Energy = -324.7315643384

|   |            |            |            |
|---|------------|------------|------------|
| B | 0.0518657  | -1.1606050 | 0.1432304  |
| F | -1.2165303 | -1.3129052 | -0.2037342 |
| F | 0.3626461  | -0.8254685 | 1.3856124  |
| F | 1.0095756  | -1.3436112 | -0.7521525 |

**B** : *t*Bu<sup>+</sup> binding to N-atom of **Ao**<sup>-</sup>

38

Energy = -1127.526494709

|   |            |            |            |
|---|------------|------------|------------|
| N | 0.7175931  | -0.7583195 | -0.4089081 |
| N | -0.3079690 | -1.2192150 | 0.0956357  |
| C | 2.0042102  | -1.5795115 | -0.0142889 |
| O | 2.4505387  | -1.3358519 | 1.1451233  |
| O | 2.3724059  | -2.3331415 | -0.8792092 |
| C | -1.6577900 | -0.8271973 | -0.2977673 |
| O | -2.1294412 | -1.3164692 | -1.3002090 |
| O | -2.1721035 | -0.1172591 | 0.6667797  |
| C | 0.8917502  | 0.3565540  | -1.4645955 |
| C | -0.1481634 | 1.4528601  | -1.2330138 |

|   |            |            |            |
|---|------------|------------|------------|
| C | 2.3118192  | 0.9070402  | -1.3003806 |
| C | 0.7181373  | -0.3266196 | -2.8355345 |
| H | -1.1504145 | 1.1527967  | -1.5433564 |
| H | -0.1551814 | 1.7819582  | -0.1920016 |
| H | 0.1396713  | 2.2989833  | -1.8624701 |
| H | 3.0695295  | 0.1352216  | -1.4589449 |
| H | 2.4525525  | 1.6684358  | -2.0716485 |
| H | 2.4492693  | 1.3693237  | -0.3217158 |
| H | 0.8436887  | 0.4508076  | -3.5950334 |
| H | 1.4753864  | -1.0975203 | -2.9868816 |
| H | -0.2769371 | -0.7640103 | -2.9349300 |
| C | -3.6700581 | 0.2322413  | 0.6893150  |
| C | -3.9853071 | 1.0820903  | -0.5341157 |
| C | -4.4545984 | -1.0711542 | 0.7456838  |
| C | -3.7753967 | 1.0256348  | 1.9827540  |
| H | -3.3500852 | 1.9719497  | -0.5630311 |
| H | -3.8692080 | 0.5147711  | -1.4597540 |
| H | -5.0263524 | 1.4118507  | -0.4607129 |
| H | -4.1212914 | -1.6849689 | 1.5872103  |
| H | -5.5107662 | -0.8264207 | 0.8967889  |
| H | -4.3610498 | -1.6394230 | -0.1816293 |
| H | -4.8142389 | 1.3396854  | 2.1199166  |
| H | -3.4785195 | 0.4127737  | 2.8379258  |
| H | -3.1430743 | 1.9168081  | 1.9430086  |
| B | 1.8722171  | -0.4203100 | 2.3076255  |
| F | 0.8877002  | -1.1565411 | 2.9383216  |
| F | 2.9718743  | -0.1827417 | 3.1065688  |
| F | 1.3703109  | 0.7480282  | 1.7344000  |

CO<sub>2</sub> : carbon dioxide

3

Energy = -188.6982055112

|   |            |            |            |
|---|------------|------------|------------|
| C | -0.0001041 | -0.0000121 | -0.0000002 |
| O | 1.1684675  | 0.0000478  | 0.0000226  |
| O | -1.1687003 | -0.0000818 | -0.0000157 |

**Co**<sup>-</sup> : anion of **C** after *t*Bu<sub>3</sub><sup>+</sup> elimination

22

Energy = -781.0616083724

|   |            |            |            |
|---|------------|------------|------------|
| N | -0.1073264 | 1.2414980  | -2.3382956 |
| N | -1.3373895 | 1.2660635  | -2.1894607 |
| C | -2.1439335 | 0.4120818  | -1.3300826 |
| O | -2.1994835 | 0.9027380  | -0.1156931 |
| O | -2.7912083 | -0.4926450 | -1.8319343 |
| C | 0.8243031  | 0.3240238  | -1.5713701 |
| C | 0.2555246  | -1.0248697 | -1.1155726 |
| C | 1.9923519  | 0.0988268  | -2.5424769 |
| C | 1.2866177  | 1.1696979  | -0.3695467 |
| H | -0.4709070 | -0.9346182 | -0.3057728 |
| H | -0.2017639 | -1.5646520 | -1.9493494 |
| H | 1.0892499  | -1.6264527 | -0.7369363 |

|   |            |            |            |
|---|------------|------------|------------|
| H | 2.3852952  | 1.0569121  | -2.8954728 |
| H | 2.7939542  | -0.4495515 | -2.0373851 |
| H | 1.6664598  | -0.4849751 | -3.4101142 |
| H | 2.0948723  | 0.6423746  | 0.1482402  |
| H | 1.6628698  | 2.1420562  | -0.7030264 |
| H | 0.4591921  | 1.3274071  | 0.3275362  |
| B | -3.0965710 | 0.3158434  | 0.9675207  |
| F | -2.8587591 | 1.1111896  | 2.0989366  |
| F | -4.4402113 | 0.4011572  | 0.5817675  |
| F | -2.7235226 | -1.0133791 | 1.2156834  |

**C : BF<sub>3</sub> adduct at ester carbonyl**

35

Energy = -938.8460855039

|   |            |            |            |
|---|------------|------------|------------|
| N | 0.4716635  | 0.4080790  | -2.3233382 |
| N | -0.5681699 | -0.2002774 | -2.5676846 |
| C | -1.5986845 | -0.7218557 | -1.7710923 |
| O | -1.7355444 | -1.9680707 | -1.6017368 |
| O | -2.5362494 | 0.1380489  | -1.5170230 |
| C | 0.9481107  | 0.7387795  | -0.9401244 |
| C | 0.1314939  | 0.1753923  | 0.2192143  |
| C | 2.3931969  | 0.2055839  | -0.9173900 |
| C | 0.9519113  | 2.2811115  | -0.9311666 |
| H | -0.8606880 | 0.6275563  | 0.2867032  |
| H | 0.0471604  | -0.9136901 | 0.1667649  |
| H | 0.6605287  | 0.4132566  | 1.1469480  |
| H | 2.9555757  | 0.5855508  | -1.7742630 |
| H | 2.8765410  | 0.5458295  | 0.0033057  |
| H | 2.4004101  | -0.8869669 | -0.9399052 |
| H | 1.4200599  | 2.6204490  | -0.0023094 |
| H | 1.5215942  | 2.6719501  | -1.7781512 |
| H | -0.0687386 | 2.6728211  | -0.9751318 |
| C | -3.9675137 | -0.2729879 | -1.0931954 |
| C | -4.5638106 | -1.1393524 | -2.1930187 |
| C | -3.8895731 | -0.9588886 | 0.2635274  |
| C | -4.6413462 | 1.0884908  | -1.0085061 |
| H | -4.4844620 | -0.6401908 | -3.1629101 |
| H | -4.0898164 | -2.1203093 | -2.2442798 |
| H | -5.6258447 | -1.2816585 | -1.9688396 |
| H | -3.3649480 | -0.3280036 | 0.9867636  |
| H | -4.9124102 | -1.1090116 | 0.6234167  |
| H | -3.3990591 | -1.9309856 | 0.2008920  |
| H | -5.6825195 | 0.9464593  | -0.7046364 |
| H | -4.1453461 | 1.7213895  | -0.2674925 |
| H | -4.6254997 | 1.5902861  | -1.9796402 |
| B | -0.6765363 | -3.0908229 | -2.0024070 |
| F | -1.1806727 | -4.2250540 | -1.3991728 |
| F | -0.6798607 | -3.1608041 | -3.3836325 |
| F | 0.5548132  | -2.7076304 | -1.4869733 |

**D : *t*Bu<sup>+</sup> binding to N-atom of Co<sup>-</sup>**

35

Energy = -938.8654489841

|   |            |            |            |
|---|------------|------------|------------|
| N | -0.0395057 | 1.2092725  | -2.3357160 |
| N | -1.2688888 | 1.2643661  | -2.2584165 |
| C | -2.2071173 | 0.3988101  | -1.3435608 |
| O | -2.1373740 | 0.8896299  | -0.1670228 |
| O | -2.8280021 | -0.4836311 | -1.8735179 |
| C | 0.8196576  | 0.2918973  | -1.5435681 |
| C | 0.2173559  | -1.0473668 | -1.1021559 |
| C | 2.0225543  | 0.0488503  | -2.4741674 |
| C | 1.2543939  | 1.1566750  | -0.3346597 |
| H | -0.5010409 | -0.9574085 | -0.2867564 |
| H | -0.2430595 | -1.5717268 | -1.9437975 |
| H | 1.0439752  | -1.6629047 | -0.7359954 |
| H | 2.4469793  | 0.9980444  | -2.8102340 |
| H | 2.7847017  | -0.5107219 | -1.9253228 |
| H | 1.7225372  | -0.5367682 | -3.3483525 |
| H | 2.0184794  | 0.5962488  | 0.2114029  |
| H | 1.6839955  | 2.1052171  | -0.6672471 |
| H | 0.4069894  | 1.3507956  | 0.3264349  |
| C | -2.0066812 | 2.2709379  | -3.1593151 |
| C | -2.5273540 | 1.4658674  | -4.3627369 |
| C | -3.1587520 | 2.8651785  | -2.3409997 |
| C | -1.0175339 | 3.3462030  | -3.5981416 |
| H | -1.6961888 | 1.0012988  | -4.9006546 |
| H | -3.2365766 | 0.6960437  | -4.0545450 |
| H | -3.0332800 | 2.1646613  | -5.0349452 |
| H | -2.7899879 | 3.3940399  | -1.4586847 |
| H | -3.6835909 | 3.5778556  | -2.9821184 |
| H | -3.8807537 | 2.1041953  | -2.0313640 |
| H | -1.5731345 | 4.0807906  | -4.1873847 |
| H | -0.5754196 | 3.8515995  | -2.7348339 |
| H | -0.2178928 | 2.9327208  | -4.2147049 |
| B | -2.9929200 | 0.3058397  | 1.0343517  |
| F | -2.6187015 | 1.0951635  | 2.1082639  |
| F | -4.3306497 | 0.4520418  | 0.7012559  |
| F | -2.6192734 | -1.0223131 | 1.1948916  |

**E : (*t*BuN)<sub>2</sub>**

28

Energy = -425.4282620030

|   |            |           |            |
|---|------------|-----------|------------|
| N | -0.0347817 | 1.2555754 | -0.8097017 |
| N | -0.8926959 | 0.5147979 | -0.3115124 |
| C | -0.2346175 | 2.7154632 | -0.5334734 |
| C | -1.4658541 | 3.0282515 | 0.3153280  |
| C | 1.0554251  | 3.1641268 | 0.1717020  |
| C | -0.3348825 | 3.3697572 | -1.9208001 |
| H | -2.3795497 | 2.6820626 | -0.1767766 |
| H | -1.4042810 | 2.5379956 | 1.2914090  |
| H | -1.5348242 | 4.1107646 | 0.4673501  |
| H | 1.9317160  | 2.8921776 | -0.4249317 |

|   |            |            |            |
|---|------------|------------|------------|
| H | 1.0456480  | 4.2503183  | 0.3094736  |
| H | 1.1413333  | 2.6889512  | 1.1548045  |
| H | -0.3671342 | 4.4592395  | -1.8168275 |
| H | 0.5301664  | 3.0993564  | -2.5342418 |
| H | -1.2441730 | 3.0417343  | -2.4358716 |
| C | -0.6928364 | -0.9451013 | -0.5876632 |
| C | -1.9829332 | -1.3938963 | -1.2926481 |
| C | 0.5383269  | -1.2579096 | -1.4365599 |
| C | -0.5923653 | -1.5992496 | 0.7997214  |
| H | -2.8591685 | -1.1213901 | -0.6961897 |
| H | -2.0686864 | -0.9192629 | -2.2760257 |
| H | -1.9734232 | -2.4801744 | -1.4297690 |
| H | 1.4521340  | -0.9119395 | -0.9445098 |
| H | 0.6070927  | -2.3404011 | -1.5888293 |
| H | 0.4767821  | -0.7674362 | -2.4125296 |
| H | -0.5595984 | -2.6887206 | 0.6958030  |
| H | 0.3167792  | -1.2708160 | 1.3147931  |
| H | -1.4575540 | -1.3292202 | 1.4131259  |

N(*t*Bu)N(*t*Bu)H<sup>+</sup> : 3<sup>+</sup>

29

Energy = -425.8604747670

|   |            |            |            |
|---|------------|------------|------------|
| N | -0.1227665 | 1.2882667  | -0.7450294 |
| N | -0.9216853 | 0.4616023  | -0.2960660 |
| C | -0.2342031 | 2.7690487  | -0.5258448 |
| C | -1.4644086 | 3.0672780  | 0.3175694  |
| C | 1.0763197  | 3.1692258  | 0.1729646  |
| C | -0.3196492 | 3.3764392  | -1.9364242 |
| H | -2.3779594 | 2.7322752  | -0.1802862 |
| H | -1.3998416 | 2.5880382  | 1.2977994  |
| H | -1.5192401 | 4.1493018  | 0.4594148  |
| H | 1.9489516  | 2.8836611  | -0.4227385 |
| H | 1.0817337  | 4.2561058  | 0.2858175  |
| H | 1.1464997  | 2.7104889  | 1.1628045  |
| H | -0.3233373 | 4.4645877  | -1.8368794 |
| H | 0.5440980  | 3.0923247  | -2.5455445 |
| H | -1.2379635 | 3.0642140  | -2.4408384 |
| C | -0.6854541 | -0.9656601 | -0.5926880 |
| C | -1.9835846 | -1.4151764 | -1.3000634 |
| C | 0.5521296  | -1.2398827 | -1.4408235 |
| C | -0.5878194 | -1.6211567 | 0.8031968  |
| H | -2.8580212 | -1.1806798 | -0.6891021 |
| H | -2.0817847 | -0.9314397 | -2.2757276 |
| H | -1.9280863 | -2.4974055 | -1.4450667 |
| H | 1.4749076  | -0.9186489 | -0.9422161 |
| H | 0.6316637  | -2.3173554 | -1.5991627 |
| H | 0.4869818  | -0.7726742 | -2.4311499 |
| H | -0.5301819 | -2.7036535 | 0.6611855  |
| H | 0.3099758  | -1.2843767 | 1.3287157  |
| H | -1.4693413 | -1.3855874 | 1.4033969  |
| H | 0.6888072  | 0.9786064  | -1.3136454 |

OEt<sub>2</sub> : diethyl ether

15

Energy = -233.8037752212

|   |            |            |            |
|---|------------|------------|------------|
| H | -2.4467365 | -0.3555488 | -0.5659141 |
| C | -2.4633475 | 0.7390841  | -0.5540457 |
| C | -1.2728798 | 1.2836815  | 0.2144867  |
| H | -3.3952576 | 1.0667615  | -0.0812608 |
| H | -2.4531516 | 1.1002579  | -1.5875264 |
| O | -0.0726166 | 0.8374932  | -0.4300978 |
| H | -1.2883007 | 2.3852387  | 0.2358201  |
| H | -1.2813501 | 0.9282402  | 1.2574202  |
| C | 1.1032019  | 1.3117814  | 0.2389663  |
| C | 2.3217406  | 0.7977478  | -0.5062441 |
| H | 1.0994661  | 0.9548940  | 1.2814346  |
| H | 1.0912990  | 2.4133416  | 0.2619370  |
| H | 3.2357547  | 1.1460970  | -0.0137261 |
| H | 2.3313732  | -0.2969428 | -0.5209652 |
| H | 2.3240526  | 1.1614549  | -1.5388831 |

R : (NCO<sub>2</sub>*t*Bu)<sub>2</sub>

34

Energy = -802.7697973713

|   |            |            |            |
|---|------------|------------|------------|
| N | 0.3310352  | 0.4344214  | -0.3256830 |
| N | -0.3265410 | -0.4085224 | 0.3140287  |
| C | 1.6700884  | -0.0176803 | -0.6724519 |
| O | 1.8962365  | -0.3795488 | -1.8078168 |
| O | 2.4773603  | 0.1462330  | 0.3550730  |
| C | -1.6653874 | 0.0428329  | 0.6617120  |
| O | -1.8874864 | 0.4205901  | 1.7927115  |
| O | -2.4772212 | -0.1413402 | -0.3587495 |
| C | 3.9708781  | -0.0998030 | 0.2246493  |
| C | 4.1953550  | -1.5692630 | -0.1160945 |
| C | 4.5373799  | 0.8558766  | -0.8198499 |
| C | 4.4670414  | 0.2364629  | 1.6253966  |
| H | 3.6954505  | -2.2117812 | 0.6149918  |
| H | 3.8313233  | -1.8070900 | -1.1171276 |
| H | 5.2698820  | -1.7748488 | -0.0760715 |
| H | 4.2777533  | 1.8898463  | -0.5734419 |
| H | 5.6284299  | 0.7658164  | -0.8160203 |
| H | 4.1724076  | 0.6180723  | -1.8205657 |
| H | 5.5510499  | 0.0932193  | 1.6656585  |
| H | 4.2417405  | 1.2772017  | 1.8749696  |
| H | 3.9995636  | -0.4174803 | 2.3670525  |
| C | -3.9717747 | 0.0959946  | -0.2233396 |
| C | -4.5251774 | -0.8472625 | 0.8393297  |
| C | -4.2049502 | 1.5689392  | 0.0957485  |
| C | -4.4736253 | -0.2658741 | -1.6156495 |
| H | -4.2585538 | -1.8829595 | 0.6080929  |
| H | -4.1569567 | -0.5905752 | 1.8341653  |
| H | -5.6169254 | -0.7659920 | 0.8397781  |

|   |            |            |            |
|---|------------|------------|------------|
| H | -3.7147310 | 2.2035688  | -0.6486655 |
| H | -5.2812330 | 1.7659379  | 0.0598277  |
| H | -3.8360847 | 1.8251053  | 1.0904724  |
| H | -5.5588022 | -0.1306065 | -1.6518257 |
| H | -4.0149430 | 0.3793897  | -2.3702814 |
| H | -4.2425819 | -1.3088803 | -1.8500241 |

***t*Bu<sup>+</sup> : CMe<sub>3</sub><sup>+</sup>**

13

Energy = -157.7248403638

|   |            |            |            |
|---|------------|------------|------------|
| C | 0.0023381  | -0.0018618 | -0.0120737 |
| C | -1.3663517 | -0.5074637 | -0.0095209 |
| C | 1.1347795  | -0.9215899 | 0.0131734  |
| C | 0.2403235  | 1.4355835  | 0.0008905  |
| H | -2.0825030 | 0.2117402  | -0.4144218 |
| H | -1.4652566 | -1.5036809 | -0.4420275 |
| H | -1.6114913 | -0.5966528 | 1.0693285  |
| H | 2.0517929  | -0.4726308 | -0.3761946 |
| H | 1.3181662  | -1.0823236 | 1.0959554  |
| H | 0.9152287  | -1.8977862 | -0.4206893 |
| H | 1.2085439  | 1.7119229  | 0.4233649  |
| H | 0.2908813  | 1.6849940  | -1.0807460 |
| H | -0.5939127 | 2.0106301  | 0.4079341  |

**TSA : OEt<sub>2</sub>-elimination and BF<sub>3</sub> binding**

53

Energy = -1361.317742090

|   |            |            |            |
|---|------------|------------|------------|
| N | 0.4253995  | 0.4472248  | -1.7744667 |
| N | -0.2682239 | -0.5393969 | -2.0829422 |
| C | 1.8088237  | 0.1231764  | -1.4834697 |
| O | 2.1763413  | 0.0010518  | -0.3284939 |
| O | 2.5131605  | 0.1190468  | -2.5900590 |
| C | -1.6502782 | -0.1979349 | -2.3930183 |
| O | -1.9897925 | -0.1198221 | -3.5546440 |
| O | -2.3519661 | -0.1222516 | -1.2828239 |
| C | 4.0305999  | -0.0291092 | -2.5547684 |
| C | 4.6159816  | 1.1449415  | -1.7785468 |
| C | 4.3728485  | -1.3863640 | -1.9504758 |
| C | 4.3828067  | 0.0372960  | -4.0349908 |
| H | 4.2756620  | 2.0939323  | -2.2035345 |
| H | 4.3462440  | 1.1008862  | -0.7219928 |
| H | 5.7067551  | 1.1033324  | -1.8615540 |
| H | 3.8405832  | -2.1845312 | -2.4764540 |
| H | 5.4479483  | -1.5556670 | -2.0685173 |
| H | 4.1276986  | -1.4244749 | -0.8878006 |
| H | 5.4679593  | -0.0453941 | -4.1473371 |
| H | 3.9106367  | -0.7837903 | -4.5817780 |
| H | 4.0575773  | 0.9879910  | -4.4668062 |
| C | -3.8577388 | 0.0778422  | -1.3226255 |
| C | -4.1532286 | 1.4226915  | -1.9780155 |
| C | -4.4912243 | -1.1026568 | -2.0504296 |

|   |            |            |            |
|---|------------|------------|------------|
| C | -4.2136426 | 0.0835128  | 0.1585954  |
| H | -3.5995491 | 2.2218788  | -1.4760471 |
| H | -3.8971710 | 1.4150206  | -3.0388421 |
| H | -5.2232576 | 1.6308390  | -1.8771631 |
| H | -4.1912347 | -2.0457147 | -1.5836866 |
| H | -5.5796358 | -1.0128861 | -1.9742121 |
| H | -4.2168435 | -1.1162058 | -3.1066617 |
| H | -5.2922731 | 0.2307171  | 0.2670993  |
| H | -3.9415256 | -0.8681569 | 0.6231968  |
| H | -3.6947946 | 0.8950577  | 0.6760573  |
| B | 0.8644306  | -0.1484046 | 1.6370272  |
| F | 0.2887215  | -1.2774724 | 1.2234667  |
| F | 1.9821717  | -0.2016241 | 2.3610118  |
| F | 0.2747336  | 1.0263323  | 1.4120457  |
| O | -0.6226492 | -0.3072058 | 3.8151367  |
| C | -0.3200683 | 0.7322812  | 4.7676469  |
| C | 0.9252141  | 0.3441855  | 5.5436422  |
| H | -1.1689998 | 0.8605981  | 5.4516179  |
| H | -0.1756016 | 1.6783106  | 4.2248298  |
| H | 1.1813708  | 1.1404508  | 6.2509615  |
| H | 0.7545795  | -0.5791294 | 6.1064165  |
| H | 1.7731005  | 0.1928355  | 4.8704222  |
| C | -1.9739187 | -0.2204933 | 3.3173030  |
| C | -2.9928704 | -0.8090266 | 4.2868292  |
| H | -1.9729838 | -0.7832558 | 2.3812292  |
| H | -2.2078940 | 0.8281004  | 3.0842873  |
| H | -3.9948849 | -0.7555457 | 3.8453924  |
| H | -2.7605105 | -1.8585282 | 4.4930261  |
| H | -3.0163504 | -0.2628639 | 5.2352417  |

**TSB1 : proton transfer from *t*Bu<sup>+</sup>**

38

Energy = -1127.488453881

|   |            |            |            |
|---|------------|------------|------------|
| N | 0.1313495  | -0.3695283 | -0.2356700 |
| N | 0.9082813  | -0.3425718 | 0.7185038  |
| C | -1.2937085 | -0.7490082 | 0.0266764  |
| C | 2.3195495  | -0.0588742 | 0.2907898  |
| O | -1.9867487 | 0.3062480  | 0.2363712  |
| O | -1.5467667 | -1.9250888 | -0.0989437 |
| O | 2.9787193  | 0.1573217  | 1.4014886  |
| O | 2.6716198  | -0.0637700 | -0.8649805 |
| B | -3.5634165 | 0.2898192  | 0.2643102  |
| F | -3.9779854 | -0.5805988 | 1.2597959  |
| F | -3.9009486 | 1.6067728  | 0.5345443  |
| F | -3.9815418 | -0.1101933 | -1.0041153 |
| H | 0.3539205  | -0.1506295 | -1.5870179 |
| C | 0.5005367  | 0.0493223  | -2.9604309 |
| C | -0.8328854 | 0.1215458  | -3.3043390 |
| H | 1.0535593  | -0.8646276 | -3.1714905 |
| H | 1.0851139  | 0.9666063  | -2.9138010 |
| C | -1.5726517 | 1.4152393  | -3.2739006 |

|   |            |            |            |
|---|------------|------------|------------|
| C | -1.6140772 | -1.1015576 | -3.6474219 |
| H | -0.9408261 | 2.2492602  | -2.9637562 |
| H | -1.9661293 | 1.6201646  | -4.2788372 |
| H | -2.4458579 | 1.3378652  | -2.6153438 |
| H | -1.0328334 | -2.0159154 | -3.5160931 |
| H | -2.5359870 | -1.1508477 | -3.0575069 |
| H | -1.9236094 | -1.0287709 | -4.6995371 |
| C | 4.4647484  | 0.4997991  | 1.3687129  |
| C | 4.6468387  | 1.7952672  | 0.5859193  |
| C | 4.7739070  | 0.6805916  | 2.8486679  |
| C | 5.2161177  | -0.6830585 | 0.7683149  |
| H | 4.4079282  | 1.6649683  | -0.4711007 |
| H | 4.0246222  | 2.5899403  | 1.0078437  |
| H | 5.6948063  | 2.0995936  | 0.6687881  |
| H | 4.5717480  | -0.2410944 | 3.4012548  |
| H | 5.8326019  | 0.9313586  | 2.9616762  |
| H | 4.1752186  | 1.4915883  | 3.2725771  |
| H | 4.9936395  | -1.6002282 | 1.3212551  |
| H | 4.9709178  | -0.8228527 | -0.2860513 |
| H | 6.2889894  | -0.4830688 | 0.8510030  |

**TSB : *t*Bu<sup>+</sup> binding to N-atom**

38

Energy = -1127.492548743

|   |            |            |            |
|---|------------|------------|------------|
| N | 0.6125279  | -0.5971661 | -0.2226633 |
| N | -0.3420809 | -1.1839074 | 0.3183466  |
| C | 1.9192451  | -1.1412270 | 0.1291514  |
| O | 2.6181525  | -0.4663721 | 0.9856199  |
| O | 2.2977933  | -2.1122746 | -0.5057938 |
| C | -1.6382186 | -0.7036410 | -0.1701551 |
| O | -1.8930147 | -0.5393972 | -1.3484866 |
| O | -2.4222012 | -0.5879466 | 0.8807210  |
| C | 1.3441760  | 1.0498763  | -2.7099364 |
| C | 0.7758067  | 2.3500479  | -2.3424186 |
| C | 2.7327154  | 0.7531602  | -2.3677852 |
| C | 0.5282618  | 0.1045163  | -3.4557820 |
| H | -0.2859271 | 2.4387332  | -2.5706987 |
| H | 0.9952449  | 2.5717655  | -1.2917319 |
| H | 1.3335789  | 3.1119545  | -2.9140116 |
| H | 2.9432998  | -0.3175370 | -2.3346417 |
| H | 3.3032374  | 1.1475602  | -3.2335756 |
| H | 3.0777333  | 1.2910856  | -1.4831467 |
| H | -0.0001623 | 0.6030451  | -4.2787249 |
| H | 1.0442174  | -0.8008218 | -3.7685036 |
| H | -0.2748714 | -0.1261525 | -2.7260599 |
| C | -3.8441345 | -0.0820099 | 0.7445937  |
| C | -3.8152255 | 1.3172562  | 0.1372290  |
| C | -4.6425878 | -1.0827988 | -0.0848055 |
| C | -4.3076491 | -0.0548186 | 2.1958836  |
| H | -3.1557693 | 1.9712262  | 0.7158672  |
| H | -3.4867566 | 1.2961328  | -0.9035027 |

|   |            |            |            |
|---|------------|------------|------------|
| H | -4.8273253 | 1.7320126  | 0.1744981  |
| H | -4.5856384 | -2.0807419 | 0.3598192  |
| H | -5.6910835 | -0.7677625 | -0.0895544 |
| H | -4.2863024 | -1.1225155 | -1.1155914 |
| H | -5.3428594 | 0.2967812  | 2.2350154  |
| H | -4.2608047 | -1.0558883 | 2.6335938  |
| H | -3.6848017 | 0.6225229  | 2.7869643  |
| B | 2.2154389  | 0.8505499  | 1.6763808  |
| F | 1.0112452  | 0.6883306  | 2.3573394  |
| F | 3.2679522  | 1.1253858  | 2.5439395  |
| F | 2.1051068  | 1.8482436  | 0.6894154  |

**TSC : CO<sub>2</sub> elimination**

38

Energy = -1127.518024342

|   |            |            |            |
|---|------------|------------|------------|
| N | 1.1014565  | -0.2999356 | -0.6965462 |
| N | 0.1357250  | -0.8496884 | -0.1752093 |
| C | 2.8627126  | -0.8381936 | 0.1828938  |
| O | 2.8896915  | -0.2324634 | 1.2284806  |
| O | 3.3585872  | -1.6063967 | -0.5652727 |
| C | -1.2388411 | -0.8085984 | -0.6564085 |
| O | -1.5948502 | -1.5674654 | -1.5349140 |
| O | -1.9339661 | -0.0319998 | 0.1456002  |
| C | 1.1023753  | 0.5911010  | -1.9253017 |
| C | -0.1488639 | 1.4695464  | -2.0222361 |
| C | 2.3608554  | 1.4598190  | -1.8113916 |
| C | 1.2193243  | -0.3745697 | -3.1229921 |
| H | -1.0373814 | 0.9047040  | -2.3105454 |
| H | -0.3348156 | 1.9993670  | -1.0848955 |
| H | 0.0290953  | 2.2100785  | -2.8072987 |
| H | 3.2641639  | 0.8448341  | -1.7658073 |
| H | 2.4296468  | 2.0904643  | -2.7016754 |
| H | 2.3170752  | 2.1045411  | -0.9305622 |
| H | 1.3106648  | 0.2272746  | -4.0323321 |
| H | 2.1074122  | -1.0045405 | -3.0296960 |
| H | 0.3327289  | -1.0078552 | -3.1998951 |
| C | -3.4544984 | 0.0030316  | 0.0898626  |
| C | -3.8882304 | 0.5119834  | -1.2801024 |
| C | -3.9824583 | -1.3902354 | 0.4114323  |
| C | -3.7805344 | 1.0012718  | 1.1930672  |
| H | -3.4411545 | 1.4885578  | -1.4877774 |
| H | -3.6188024 | -0.1897999 | -2.0716605 |
| H | -4.9764505 | 0.6299064  | -1.2761358 |
| H | -3.5837580 | -1.7391956 | 1.3685170  |
| H | -5.0728415 | -1.3360380 | 0.4927320  |
| H | -3.7280598 | -2.1066825 | -0.3716997 |
| H | -4.8663166 | 1.1169632  | 1.2611998  |
| H | -3.4041305 | 0.6470601  | 2.1566764  |
| H | -3.3375374 | 1.9768329  | 0.9737698  |
| B | 1.7909534  | 0.8993918  | 2.2778702  |
| F | 0.9493631  | -0.0065910 | 2.8112740  |



F 2.7683275 1.3816798 3.0728809  
F 1.2867386 1.7443935 1.3504818

**TSD1** : proton transfer from *t*Bu<sub>+</sub>

35

Energy = -938.8190472929

N -1.3810224 -0.8641281 -0.4473507  
N -0.5810303 -0.7201225 0.4724765  
C -0.7410206 -0.0790393 1.7996111  
O -0.1254301 1.0499535 1.9555141  
O -1.2749826 -0.7441815 2.6675877  
C -2.7522786 -0.2602089 -0.5057692  
C -3.1187399 0.7834692 0.5492957  
C -2.8012355 0.3555133 -1.9167917  
C -3.6798332 -1.4898768 -0.4281583  
H -3.2209889 0.3523726 1.5469458  
H -2.3943892 1.6013716 0.5705414  
H -4.0887252 1.2071057 0.2706720  
H -2.5087624 -0.3824764 -2.6683955  
H -3.8238741 0.6863916 -2.1211314  
H -2.1310535 1.2169703 -1.9810075  
H -4.7076467 -1.1585488 -0.6046782  
H -3.4111054 -2.2285467 -1.1882068  
H -3.6237330 -1.9542351 0.5606067  
C 2.6592377 -1.6200363 -0.5462145  
C 2.7620471 -0.9308718 -1.8553587  
C 3.7605456 -1.4299813 0.4269723  
C 1.5225123 -2.3720637 -0.2183884  
H 1.9336221 -1.1713331 -2.5228316  
H 2.7990409 0.1527122 -1.6844615  
H 3.7137697 -1.1975056 -2.3334007  
H 4.0142940 -0.3689536 0.5201070  
H 3.5329950 -1.8562474 1.4048715  
H 4.6550542 -1.9282966 0.0235127  
H 1.6003370 -3.0357547 0.6431016  
H 0.7423890 -1.5000214 0.1737218  
H 0.9338417 -2.7575687 -1.0535716  
B 0.6943461 1.7846344 0.8806517  
F 1.0911300 2.9721858 1.4820143  
F 1.7992741 0.9822625 0.5534000  
F -0.1004312 2.0165958 -0.2458652

**TSD** : *t*Bu<sup>+</sup> binding to N-atom

35

Energy = -938.8178525862

N -1.0282900 -1.1110912 -0.2817978  
N -0.1352732 -0.5801083 0.3593843  
C -0.1389813 0.4093975 1.4292327  
O 0.2843315 1.5954756 1.0990080  
O -0.3132978 0.0078644 2.5690599  
C -2.4993699 -0.7696361 -0.2088687

C -2.8822714 0.4053484 0.6879958  
C -2.8799525 -0.4971232 -1.6738904  
C -3.1416230 -2.0813377 0.2760150  
H -2.7019724 0.1931879 1.7438034  
H -2.3543586 1.3178840 0.3992718  
H -3.9539793 0.5886177 0.5595011  
H -2.5700479 -1.3294385 -2.3122567  
H -3.9666364 -0.3860707 -1.7417855  
H -2.4061374 0.4217532 -2.0279481  
H -4.2301485 -1.9705869 0.2503295  
H -2.8569411 -2.9147609 -0.3723601  
H -2.8376641 -2.3065604 1.3028310  
C 2.3359339 -2.1544191 -0.2845730  
C 2.0359990 -1.9430556 -1.7049958  
C 3.3212451 -1.3210217 0.4093692  
C 1.7337028 -3.3143911 0.3928493  
H 0.9461201 -1.9866251 -1.8545184  
H 2.4515690 -1.0195081 -2.1034857  
H 2.4261378 -2.8072991 -2.2689069  
H 3.3699754 -0.3086749 0.0046259  
H 3.1999184 -1.3320240 1.4938526  
H 4.3023292 -1.7895601 0.1922782  
H 2.3368678 -4.1965034 0.1116405  
H 1.7564582 -3.2292505 1.4796393  
H 0.7221395 -3.5093110 0.0219541  
B 0.5948583 2.0972777 -0.3155713  
F 0.9560411 3.4325540 -0.1459047  
F 1.6527792 1.3537022 -0.8582691  
F -0.5492174 1.9777563 -1.1162565

**TSE** : CO<sub>2</sub> elimination

35

Energy = -938.8540123044

N 0.5190778 0.3205959 -2.0403799  
N -0.4431579 -0.0657243 -1.3780191  
C -0.5983085 -0.7991079 0.6531851  
O -0.2848817 0.2141925 1.2274346  
O -0.9588172 -1.9158371 0.5767496  
C 1.9138050 0.0211789 -1.5908642  
C 2.0696249 -1.1984430 -0.6778933  
C 2.6737909 -0.2079279 -2.9087816  
C 2.4059534 1.3135871 -0.9131600  
H 1.7774900 -0.9986081 0.3544972  
H 1.4972884 -2.0501630 -1.0576485  
H 3.1265433 -1.4808370 -0.6579533  
H 2.5321765 0.6409365 -3.5833306  
H 3.7412208 -0.3235557 -2.6985387  
H 2.3176183 -1.1151060 -3.4080623  
H 3.4750547 1.2179768 -0.7003623  
H 2.2565463 2.1745858 -1.5714798  
H 1.8716196 1.4852109 0.0250415

|   |            |            |            |   |            |            |            |
|---|------------|------------|------------|---|------------|------------|------------|
| C | -1.8008021 | 0.2466594  | -1.9705524 | H | -2.8163140 | 0.1511721  | -0.0308679 |
| C | -2.3707361 | -1.1151675 | -2.4080084 | H | -2.7085633 | 1.3935045  | -3.5351687 |
| C | -2.6570127 | 0.8565468  | -0.8523599 | H | -1.2482297 | 2.1533428  | -2.8597176 |
| C | -1.6990848 | 1.2023908  | -3.1584736 | H | -1.0954131 | 0.7749686  | -3.9621910 |
| H | -1.7535664 | -1.5513427 | -3.1994960 | B | 0.4295078  | 0.2376450  | 3.0480089  |
| H | -2.4171160 | -1.8133377 | -1.5689557 | F | 1.1935384  | 1.3343891  | 2.9081172  |
| H | -3.3829677 | -0.9658446 | -2.7959453 | F | -0.7227402 | 0.3518277  | 3.7321935  |
| H | -2.1986697 | 1.7670201  | -0.4559488 | F | 1.0488301  | -0.9604875 | 3.0581162  |
| H | -3.6385045 | 1.1105859  | -1.2628224 |   |            |            |            |

## References

---

- <sup>1</sup> Sheldrick, G. M. *Acta Cryst. Sec. A* **2008**, *64*, 112-122.
- <sup>2</sup> Dolomanov, O. V.; Bourhis, L. J.; Gildea, R. J.; Howard, J. A. K.; Puschmann, H. *J. Appl. Crystallogr.* **2009**, *42*, 339-341.
- <sup>3</sup> Hara, K.; Akiyama, R.; Sawamura, M., *Org. Lett.* **2005**, *7*, 25, 5621–5623.
- <sup>4</sup> *TURBOMOLE V7.4*, **2019**, a development of University of Karlsruhe and Forschungszentrum Karlsruhe GmbH, 1989-2007, TURBOMOLE GmbH, since 2007; available from <http://www.turbomole.com>.
- <sup>5</sup> a) P. Pracht, F. Bohle, S. Grimme, *Phys. Chem. Chem. Phys.* **2020**, *22*, 7169-7192; b) S. Grimme, *J. Chem. Theory Comput.* **2019**, *15*, 2847-2862.
- <sup>6</sup> J. Tao, J. P. Perdew, V. N. Staroverov, G. E. Scuseria, *Phys. Rev. Lett.* **2003**, *91*, 146401.
- <sup>7</sup> a) S. Grimme, J. Antony, S. Ehrlich, H. Krieg, *J. Chem. Phys.* **2010**, *132*, 154104-154119; b) S. Grimme, S. Ehrlich, L. Goerigk, *J. Comput. Chem.* **2011**, *32*, 1456-1465.
- <sup>8</sup> a) F. Weigend, M. Häser, H. Patzelt, R. Ahlrichs, *Chem. Phys. Lett.* **1998**, *294*, 143-152; b) F. Weigend, R. Ahlrichs, *Phys. Chem. Chem. Phys.* **2005**, *7*, 3297-3305.
- <sup>9</sup> A. Klamt, G. Schüürmann, *J. Chem. Soc., Perkin Trans. 2* **1993**, 799-805.
- <sup>10</sup> a) K. Eichkorn, F. Weigend, O. Treutler, R. Ahlrichs, *Theor. Chem. Acc.* **1997**, *97*, 119-124; b) F. Weigend, *Phys. Chem. Chem. Phys.* **2006**, *8*, 1057-1065.
- <sup>11</sup> P. Deglmann, K. May, F. Furche, R. Ahlrichs, *Chem. Phys. Lett.* **2004**, *384*, 103-107.
- <sup>12</sup> S. Grimme, *Chem. Eur. J.* **2012**, *18*, 9955-9964.
- <sup>13</sup> F. Eckert, A. Klamt, *AIChE J.* **2002**, *48*, 369-385.
- <sup>14</sup> Eckert, F.; Klamt, A. *COSMOtherm, Version C3.0, Release 16.01; COSMOlogic GmbH & Co. KG, Leverkusen, Germany* **2015**.
- <sup>15</sup> Y. Zhao, D. G. Truhlar, *J. Phys. Chem. A* **2005**, *109*, 5656-5667.
- <sup>16</sup> F. Weigend, F. Furche, R. Ahlrichs, *J. Chem. Phys.* **2003**, *119*, 12753-12762.
- <sup>17</sup> L. Goerigk, A. Hansen, C. Bauer, S. Ehrlich, A. Najibi, S. Grimme, *Phys. Chem. Chem. Phys.* **2017**, *19*, 32184-32215.
